# Supplementary material for: Early Introduction of Sugar-Sweetened Beverages and Caries Trajectories from Age 12 to 48 Months
Source: PubMed Central journal article supplement (PMC7536523; doi:10.1177/0022034520917398), 2020-05-06
Supplement: DS_10.1177_0022034520917398.pdf [file DS_10.1177_0022034520917398.pdf]

**Appendix Table 1.** Comparison of baseline characteristics between children in the study sample and those excluded because of missing data.

| Baseline predictors                      | Lost to follow-up<br>(n=308) |      | Study sample<br>(n=1111) |      | p value |
|------------------------------------------|------------------------------|------|--------------------------|------|---------|
|                                          | n                            | %    | n                        | %    |         |
| <i>Maternal age at birth</i>             |                              |      |                          |      | <0.001  |
| 16-24 years                              | 108                          | 49.8 | 334                      | 30.1 |         |
| 25-34 years                              | 97                           | 44.7 | 696                      | 62.7 |         |
| 35-44 years                              | 12                           | 5.5  | 81                       | 7.3  |         |
| <i>Maternal education</i>                |                              |      |                          |      | 0.025   |
| None                                     | 76                           | 39.6 | 256                      | 31.1 |         |
| Secondary                                | 73                           | 38.0 | 296                      | 35.9 |         |
| A-levels                                 | 28                           | 14.6 | 184                      | 22.3 |         |
| Higher education                         | 15                           | 7.8  | 88                       | 10.7 |         |
| <i>Maternal smoking during pregnancy</i> |                              |      |                          |      | <0.001  |
| Non-smoker                               | 134                          | 52.1 | 740                      | 66.6 |         |
| Smoker                                   | 123                          | 47.9 | 371                      | 33.4 |         |
| <i>Parental employment</i>               |                              |      |                          |      | 0.051   |
| None employed                            | 23                           | 15.8 | 149                      | 13.4 |         |
| One employed                             | 67                           | 45.9 | 417                      | 37.5 |         |
| Both employed                            | 56                           | 38.4 | 545                      | 49.1 |         |
| <i>Area deprivation</i>                  |                              |      |                          |      | <0.001  |
| Affluent                                 | 41                           | 13.4 | 282                      | 25.4 |         |
| Intermediate                             | 77                           | 25.1 | 281                      | 25.3 |         |
| Deprived                                 | 189                          | 61.6 | 548                      | 49.3 |         |
| <i>Child's age at baseline, months</i>   | 13.1 ± 2.0                   |      | 12.8 ± 1.7               |      | 0.007   |
| <i>Child's sex</i>                       |                              |      |                          |      | 0.271   |
| Male                                     | 156                          | 50.6 | 602                      | 54.2 |         |
| Female                                   | 152                          | 49.4 | 509                      | 45.8 |         |
| <i>Child's birthweight</i>               |                              |      |                          |      | 0.028   |
| ≥2.5kg                                   | 255                          | 90.8 | 1048                     | 94.3 |         |
| <2.5kg                                   | 26                           | 9.3  | 63                       | 5.7  |         |
| <i>Child's breastfeeding</i>             |                              |      |                          |      | <0.001  |
| Never                                    | 199                          | 65.9 | 598                      | 53.8 |         |
| <6 months                                | 77                           | 25.5 | 318                      | 28.6 |         |
| ≥6 months                                | 26                           | 8.6  | 195                      | 17.6 |         |
| <i>Child's toothbrushing frequency</i>   |                              |      |                          |      | 0.080   |
| No brushing                              | 86                           | 30.3 | 265                      | 23.9 |         |
| Once a day                               | 80                           | 28.2 | 352                      | 31.7 |         |
| Twice or more a day                      | 118                          | 41.6 | 494                      | 44.5 |         |
| <i>Child's dmfs at baseline</i>          | 0.18 ± 0.07                  |      | 0.05 ± 0.01              |      | 0.005   |

**Appendix Table 2.** Model building selection process based on the Likelihood Ratio test and the Akaike Information Criterion (AIC).

| Models | Interaction with time                         | Likelihood ratio test |    |                      |         | AIC      |
|--------|-----------------------------------------------|-----------------------|----|----------------------|---------|----------|
|        |                                               | Log-likelihood        | df | X <sup>2</sup> value | p value |          |
| M0     | Model with main effects                       | -8056.25              | 25 |                      |         | 16162.49 |
| M1     | M0 + Age X Maternal age at birth              | -8054.57              | 27 | 3.35                 | 0.187   | 16163.14 |
| M2     | M0 + Age X Maternal education                 | -8045.03              | 29 | 22.44                | <0.001  | 16148.05 |
| M3     | M0 + Age X Maternal smoking during pregnancy  | -8045.00              | 26 | 22.50                | <0.001  | 16141.99 |
| M4     | M0 + Age X Parental employment                | -8043.25              | 27 | 26.00                | <0.001  | 16140.49 |
| M5     | M0 + Age X Area deprivation                   | -8050.37              | 27 | 11.75                | 0.003   | 16154.74 |
| M6     | M0 + Age X Child's sex                        | -8055.63              | 26 | 1.23                 | 0.267   | 16163.26 |
| M7     | M0 + Age X Child's birth weight               | -8056.21              | 26 | 0.08                 | 0.780   | 16164.42 |
| M8     | M0 + Age X Child's breastfeeding              | -8053.38              | 27 | 5.74                 | 0.057   | 16160.76 |
| M9     | M0 + Age X Initial SSB intake                 | -8049.95              | 26 | 12.60                | <0.001  | 16151.89 |
| M10    | M0 + Age X Deviation in SSB intake            | -8050.13              | 26 | 12.24                | <0.001  | 16152.25 |
| M11    | M0 + Age X Child's toothbrushing frequency    | -8052.77              | 27 | 6.96                 | 0.031   | 16159.53 |
| M12    | M4 + Age X Maternal education                 | -8035.38              | 31 | 15.73                | 0.003   | 16132.76 |
| M13    | M12 + Age X Area deprivation                  | -8034.79              | 33 | 1.17                 | 0.557   | 16135.59 |
| M14    | M12 + Age X Maternal smoking during pregnancy | -8030.82              | 28 | 7.04                 | 0.001   | 16117.64 |
| M15    | M14 + Age X child's sex                       | -8030.29              | 29 | 1.07                 | 0.301   | 16118.57 |
| M16    | M14 + Age X child's birth weight              | -8030.76              | 29 | 0.12                 | 0.728   | 16119.52 |
| M17    | M14 + Age X child's breastfeeding             | -8030.76              | 33 | 0.12                 | 1.000   | 16127.52 |
| M18    | M14 + Age X Initial SSB intake                | -8028.29              | 29 | 5.07                 | 0.024   | 16114.57 |
| M19    | M18 + Age X Deviation SSB intake              | -8020.41              | 34 | 15.75                | 0.008   | 16108.82 |
| M20    | M19 + Age X Child's toothbrushing frequency   | -8017.07              | 36 | 5.43                 | 0.056   | 16110.14 |

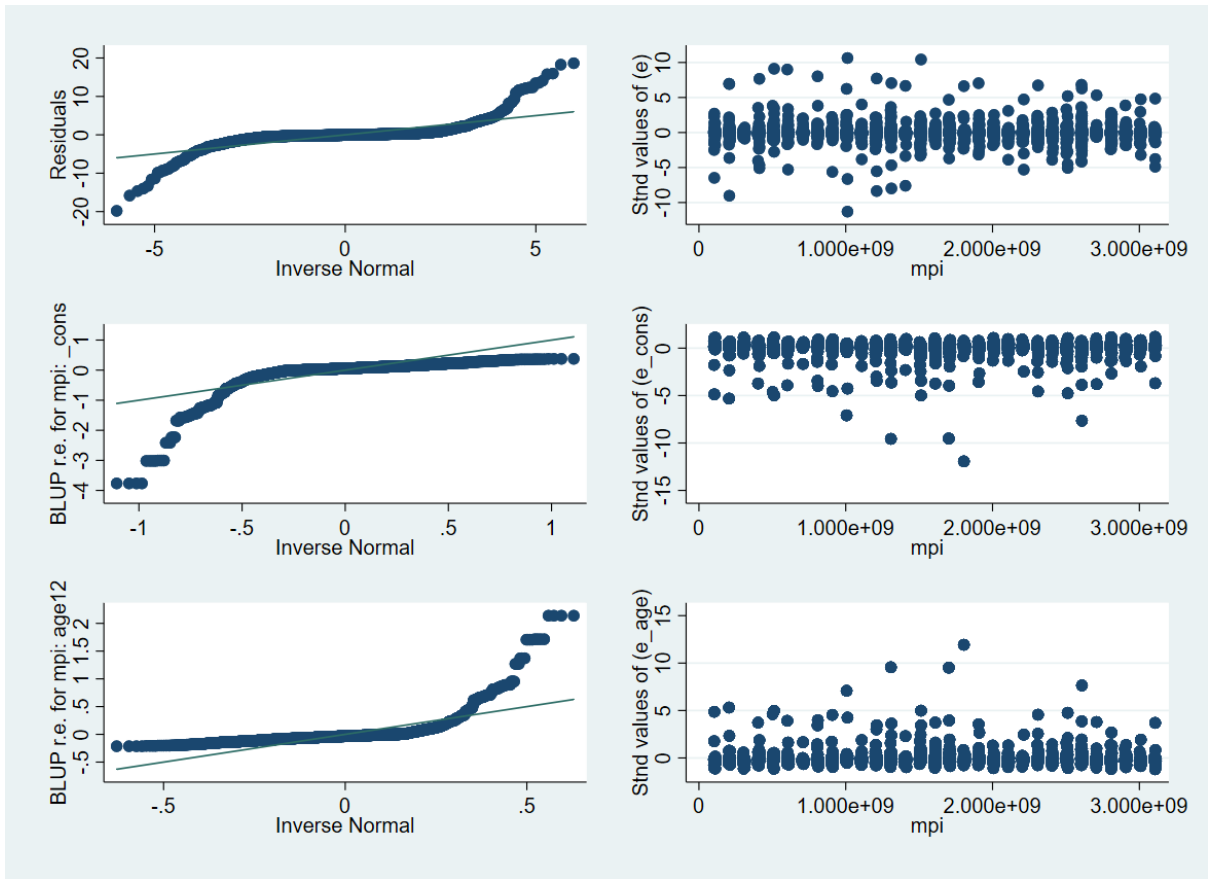

**Appendix Figure.** Examining the normality assumption of the final linear mixed effects (LME) model presented in Table 3. Left panel shows normal probability plots for the raw residuals at level-1 and level-2. Right panel shows plots of standardized residuals at level-1 and level-2 vs. *ID* numbers.
